# Supplementary material
Source: PubMed Central journal article supplement (PMC2034255)

A

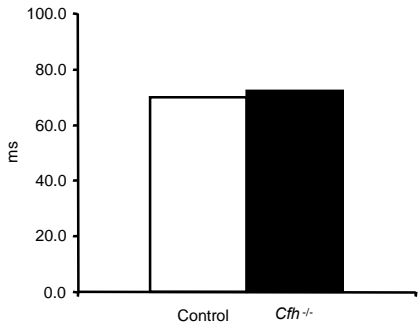

B

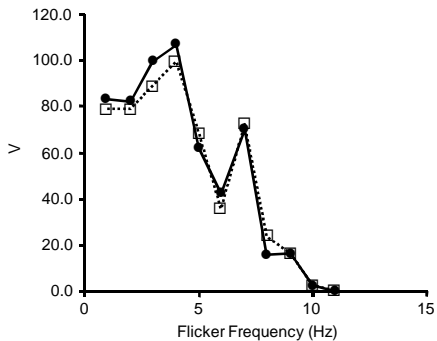

Supplement: pnas_0705079104_1.pdf [file pnas_0705079104_1.pdf]

Wild type

*Cfh*<sup>-/-</sup>

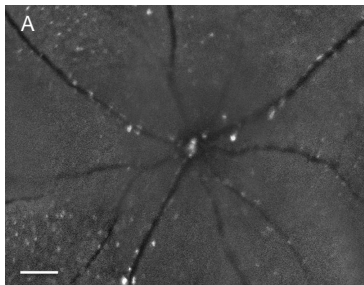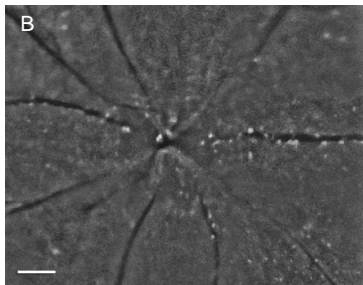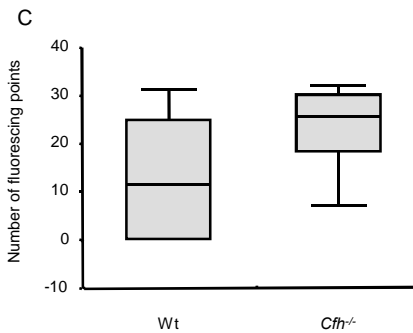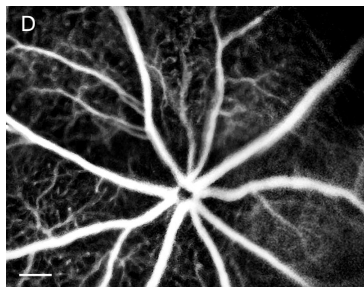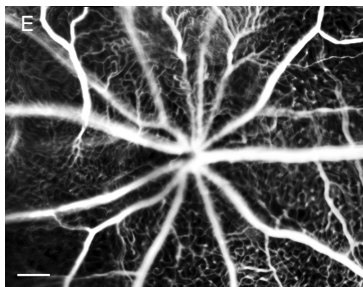

Supplement: pnas_0705079104_2.pdf [file pnas_0705079104_2.pdf]

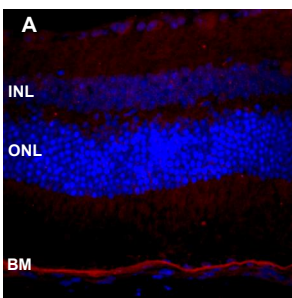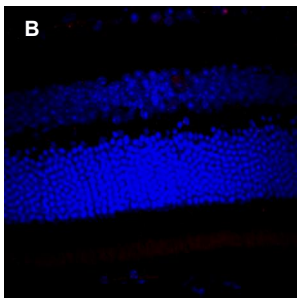

Supplement: pnas_0705079104_3.pdf [file pnas_0705079104_3.pdf]
